# Supplementary material for: Solvent-induced Mn(ii)/Zn(ii)/Co(ii) organopolymolybdate compounds constructed by bis-pyridyl-bis-amide ligands through the Mo–N bond: synthesis, structures and properties
Source: Royal Society of Chemistry journal article supplement (doi:10.1039/c5dt03375f), 2015-11-13
Supplement: c5dt03375f1.pdf [file c5dt03375f1.pdf]

Supplementary Material (ESI) for Dalton Transactions  
This journal is © The Royal Society of Chemistry

# Solvent-induced Mn(II)/Zn(II)/Co(II) Organopolymolybdate Compounds Constructed by Bis-pyridyl-bis-amide Ligand through Mo-N Bond: Synthesis, Structures and Properties

Na Xu, Ju-Wen Zhang\*, Xiu-Li Wang\*, Guo-Cheng Liu, Tian-Jiao Li

*Department of Chemistry, Bohai University, Liaoning Province Silicon Materials Engineering Technology  
Research Centre, Jinzhou, 121000, P. R. China*

Table S1 Selected bond distances (Å) and angles (°) for compounds 1–3.

| <b>C<sub>56</sub>H<sub>66</sub>MnMo<sub>8</sub>N<sub>12</sub>O<sub>44</sub></b> |            |                   |            |
|---------------------------------------------------------------------------------|------------|-------------------|------------|
| Mn-O(1W)                                                                        | 2.153(4)   | Mo(2)-O(13)       | 2.154(3)   |
| Mn-O(1W)#1                                                                      | 2.153(4)   | Mo(2)-O(2)        | 2.414(3)   |
| Mn-O(2W)#1                                                                      | 2.202(4)   | Mo(3)-O(14)       | 1.702(4)   |
| Mn-O(2W)                                                                        | 2.202(4)   | Mo(3)-O(10)       | 1.718(4)   |
| Mn-N(6)                                                                         | 2.299(5)   | Mo(3)-O(1)        | 1.871(3)   |
| Mn-N(6)#1                                                                       | 2.299(5)   | Mo(3)-O(13)       | 2.105(3)   |
| Mo(1)-O(8)                                                                      | 1.703(4)   | Mo(3)-O(3)        | 2.256(3)   |
| Mo(1)-O(7)                                                                      | 1.706(4)   | Mo(3)-N(2)        | 2.273(4)   |
| Mo(1)-O(13)#2                                                                   | 1.928(3)   | Mo(4)-O(12)       | 1.705(4)   |
| Mo(1)-O(11)                                                                     | 1.947(3)   | Mo(4)-O(9)        | 1.713(4)   |
| Mo(1)-O(2)                                                                      | 2.234(3)   | Mo(4)-O(11)       | 1.946(3)   |
| Mo(1)-O(5)                                                                      | 2.329(3)   | Mo(4)-O(1)        | 1.970(3)   |
| Mo(2)-O(6)                                                                      | 1.695(3)   | Mo(4)-O(2)        | 2.228(3)   |
| Mo(2)-O(5)                                                                      | 1.746(3)   | Mo(4)-O(3)        | 2.276(3)   |
| Mo(2)-O(3)                                                                      | 1.925(3)   | O(2)-Mo(2)#2      | 1.937(3)   |
| Mo(2)-O(2)#2                                                                    | 1.937(3)   | O(13)-Mo(1)#2     | 1.928(3)   |
| O(1W)-Mn-O(1W)#1                                                                | 180.00(13) | O(14)-Mo(3)-O(13) | 91.57(16)  |
| O(1W)-Mn-O(2W)#1                                                                | 91.57(14)  | O(10)-Mo(3)-O(13) | 155.76(16) |
| O(1W)#1-Mn-O(2W)#1                                                              | 88.43(14)  | O(1)-Mo(3)-O(13)  | 90.77(14)  |
| O(1W)-Mn-O(2W)                                                                  | 88.43(14)  | O(14)-Mo(3)-O(3)  | 161.65(16) |
| O(1W)#1-Mn-O(2W)                                                                | 91.57(14)  | O(10)-Mo(3)-O(3)  | 92.08(15)  |
| O(2W)#1-Mn-O(2W)                                                                | 180.000(1) | O(1)-Mo(3)-O(3)   | 76.88(13)  |
| O(1W)-Mn-N(6)                                                                   | 91.66(16)  | O(13)-Mo(3)-O(3)  | 70.09(12)  |
| O(1W)#1-Mn-N(6)                                                                 | 88.34(16)  | O(14)-Mo(3)-N(2)  | 93.57(17)  |
| O(2W)#1-Mn-N(6)                                                                 | 93.93(17)  | O(10)-Mo(3)-N(2)  | 84.79(16)  |
| O(2W)-Mn-N(6)                                                                   | 86.07(17)  | O(1)-Mo(3)-N(2)   | 159.41(15) |
| O(1W)-Mn-N(6)#1                                                                 | 88.34(16)  | O(13)-Mo(3)-N(2)  | 77.12(14)  |
| O(1W)#1-Mn-N(6)#1                                                               | 91.66(16)  | O(3)-Mo(3)-N(2)   | 83.30(13)  |

**Supplementary Material (ESI) for Dalton Transactions**  
**This journal is © The Royal Society of Chemistry**

|                     |            |                     |            |
|---------------------|------------|---------------------|------------|
| O(2W)#1-Mn-N(6)#1   | 86.07(17)  | O(12)-Mo(4)-O(9)    | 104.83(18) |
| O(2W)-Mn-N(6)#1     | 93.93(17)  | O(12)-Mo(4)-O(11)   | 100.86(17) |
| N(6)-Mn-N(6)#1      | 180.000(1) | O(9)-Mo(4)-O(11)    | 96.88(16)  |
| O(8)-Mo(1)-O(7)     | 104.72(19) | O(12)-Mo(4)-O(1)    | 95.86(16)  |
| O(8)-Mo(1)-O(13)#2  | 102.84(17) | O(9)-Mo(4)-O(1)     | 99.37(16)  |
| O(7)-Mo(1)-O(13)#2  | 97.18(16)  | O(11)-Mo(4)-O(1)    | 152.82(14) |
| O(8)-Mo(1)-O(11)    | 104.05(17) | O(12)-Mo(4)-O(2)    | 89.54(15)  |
| O(7)-Mo(1)-O(11)    | 96.66(16)  | O(9)-Mo(4)-O(2)     | 164.47(16) |
| O(13)#2-Mo(1)-O(11) | 145.38(15) | O(11)-Mo(4)-O(2)    | 74.25(13)  |
| O(8)-Mo(1)-O(2)     | 156.47(16) | O(1)-Mo(4)-O(2)     | 84.68(13)  |
| O(7)-Mo(1)-O(2)     | 98.78(15)  | O(12)-Mo(4)-O(3)    | 160.89(15) |
| O(13)#2-Mo(1)-O(2)  | 72.54(13)  | O(9)-Mo(4)-O(3)     | 93.16(15)  |
| O(11)-Mo(1)-O(2)    | 74.08(13)  | O(11)-Mo(4)-O(3)    | 82.96(13)  |
| O(8)-Mo(1)-O(5)     | 85.74(16)  | O(1)-Mo(4)-O(3)     | 74.55(13)  |
| O(7)-Mo(1)-O(5)     | 169.39(15) | O(2)-Mo(4)-O(3)     | 73.36(12)  |
| O(13)#2-Mo(1)-O(5)  | 81.97(13)  | C(27)-N(6)-Mn       | 115.9(4)   |
| O(11)-Mo(1)-O(5)    | 78.72(14)  | C(21)-N(6)-Mn       | 125.7(4)   |
| O(2)-Mo(1)-O(5)     | 70.82(12)  | Mo(3)-O(1)-Mo(4)    | 114.43(16) |
| O(6)-Mo(2)-O(5)     | 104.60(17) | Mo(2)#2-O(2)-Mo(4)  | 151.33(17) |
| O(6)-Mo(2)-O(3)     | 103.79(16) | Mo(2)#2-O(2)-Mo(1)  | 102.72(14) |
| O(5)-Mo(2)-O(3)     | 100.48(15) | Mo(4)-O(2)-Mo(1)    | 93.15(12)  |
| O(6)-Mo(2)-O(2)#2   | 103.83(16) | Mo(2)#2-O(2)-Mo(2)  | 104.15(14) |
| O(5)-Mo(2)-O(2)#2   | 98.60(15)  | Mo(4)-O(2)-Mo(2)    | 97.55(12)  |
| O(3)-Mo(2)-O(2)#2   | 140.99(14) | Mo(1)-O(2)-Mo(2)    | 96.28(12)  |
| O(6)-Mo(2)-O(13)    | 96.75(15)  | Mo(2)-O(3)-Mo(3)    | 108.19(15) |
| O(5)-Mo(2)-O(13)    | 158.59(14) | Mo(2)-O(3)-Mo(4)    | 112.25(15) |
| O(3)-Mo(2)-O(13)    | 75.63(13)  | Mo(3)-O(3)-Mo(4)    | 90.90(11)  |
| O(2)#2-Mo(2)-O(13)  | 74.25(13)  | Mo(2)-O(5)-Mo(1)    | 115.67(16) |
| O(6)-Mo(2)-O(2)     | 178.27(15) | Mo(4)-O(11)-Mo(1)   | 112.69(16) |
| O(5)-Mo(2)-O(2)     | 77.13(13)  | Mo(1)#2-O(13)-Mo(3) | 148.33(18) |
| O(3)-Mo(2)-O(2)     | 75.72(12)  | Mo(1)#2-O(13)-Mo(2) | 106.05(15) |
| O(2)#2-Mo(2)-O(2)   | 75.85(14)  | Mo(3)-O(13)-Mo(2)   | 105.58(14) |
| O(13)-Mo(2)-O(2)    | 81.53(12)  | Mn-O(1W)-H(1WA)     | 141.7      |
| O(14)-Mo(3)-O(10)   | 105.69(19) | Mn-O(1W)-H(1WB)     | 105.8      |
| O(14)-Mo(3)-O(1)    | 103.47(17) | Mn-O(2W)-H(2WA)     | 141.9      |
| O(10)-Mo(3)-O(1)    | 101.30(17) | Mn-O(2W)-H(2WB)     | 104.9      |

Symmetry codes for **1**: #1 - x + 2, - y + 2, - z; #2 - x, - y + 2, - z + 1.

**C<sub>56</sub>H<sub>57</sub>Mo<sub>8</sub>N<sub>12</sub>O<sub>39</sub>Zn<sub>2</sub>**

|               |           |               |          |
|---------------|-----------|---------------|----------|
| Zn(1)-O(3W)#1 | 1.098(12) | Mo(2)-O(15)#3 | 1.919(5) |
| Zn(1)-O(3W)   | 2.014(12) | Mo(2)-O(17)   | 1.945(4) |
| Zn(1)-O(11)   | 2.064(14) | Mo(2)-O(19)   | 2.134(5) |
| Zn(1)-O(4W)   | 2.113(13) | Mo(2)-O(17)#3 | 2.426(5) |
| Zn(1)-O(9)    | 2.167(6)  | Mo(3)-O(16)   | 1.701(5) |
| Zn(1)-N(6)    | 2.225(8)  | Mo(3)-O(8)    | 1.710(5) |

**Supplementary Material (ESI) for Dalton Transactions**  
**This journal is © The Royal Society of Chemistry**

|                       |            |                     |            |
|-----------------------|------------|---------------------|------------|
| Zn(1)-O(10)           | 2.557(8)   | Mo(3)-O(7)          | 1.961(5)   |
| Zn(1)-Zn(1)#1         | 3.057(4)   | Mo(3)-O(18)         | 1.962(5)   |
| Zn(2)-O(2W)           | 2.101(5)   | Mo(3)-O(17)         | 2.211(5)   |
| Zn(2)-O(2W)#2         | 2.101(5)   | Mo(3)-O(15)         | 2.290(5)   |
| Zn(2)-O(1W)           | 2.144(6)   | Mo(4)-O(10)         | 1.698(5)   |
| Zn(2)-O(1W)#2         | 2.144(6)   | Mo(4)-O(6)          | 1.715(5)   |
| Zn(2)-N(2)#2          | 2.188(7)   | Mo(4)-O(7)          | 1.877(5)   |
| Zn(2)-N(2)            | 2.188(7)   | Mo(4)-O(19)#3       | 2.090(5)   |
| Mo(1)-O(12)           | 1.709(5)   | Mo(4)-O(15)         | 2.245(5)   |
| Mo(1)-O(9)            | 1.710(5)   | Mo(4)-N(5)          | 2.252(7)   |
| Mo(1)-O(18)           | 1.932(5)   | O(14)-Mo(1)#3       | 2.321(5)   |
| Mo(1)-O(19)           | 1.933(5)   | O(15)-Mo(2)#3       | 1.919(5)   |
| Mo(1)-O(17)           | 2.225(5)   | O(17)-Mo(2)#3       | 2.426(5)   |
| Mo(1)-O(14)#3         | 2.321(5)   | O(19)-Mo(4)#3       | 2.090(5)   |
| Mo(2)-O(13)           | 1.684(5)   | O(3W)-Zn(1)#1       | 1.098(12)  |
| Mo(2)-O(14)           | 1.746(5)   | O(3W)#1-Zn(1)-O(9)  | 153.4(8)   |
| O(3W)#1-Zn(1)-O(3W)   | 22.5(12)   | O(3W)-Zn(1)-O(9)    | 166.3(4)   |
| O(3W)#1-Zn(1)-O(11)   | 112.0(9)   | O(11)-Zn(1)-O(9)    | 91.8(4)    |
| O(3W)-Zn(1)-O(11)     | 89.5(6)    | O(4W)-Zn(1)-O(9)    | 84.9(4)    |
| O(3W)#1-Zn(1)-O(4W)   | 69.1(8)    | O(3W)#1-Zn(1)-N(6)  | 99.7(7)    |
| O(3W)-Zn(1)-O(4W)     | 90.4(6)    | O(3W)-Zn(1)-N(6)    | 103.7(5)   |
| O(11)-Zn(1)-O(4W)     | 165.4(5)   | O(11)-Zn(1)-N(6)    | 94.4(4)    |
| O(4W)-Zn(1)-N(6)      | 99.7(4)    | O(10)-Mo(4)-O(6)    | 106.5(3)   |
| O(9)-Zn(1)-N(6)       | 89.8(3)    | O(10)-Mo(4)-O(7)    | 103.5(2)   |
| O(3W)#1-Zn(1)-Zn(1)#1 | 14.6(8)    | O(6)-Mo(4)-O(7)     | 101.7(2)   |
| O(3W)-Zn(1)-Zn(1)#1   | 7.9(4)     | O(10)-Mo(4)-O(19)#3 | 90.7(2)    |
| O(11)-Zn(1)-Zn(1)#1   | 97.4(4)    | O(6)-Mo(4)-O(19)#3  | 155.5(2)   |
| O(4W)-Zn(1)-Zn(1)#1   | 82.9(3)    | O(7)-Mo(4)-O(19)#3  | 90.6(2)    |
| O(9)-Zn(1)-Zn(1)#1    | 164.0(2)   | O(10)-Mo(4)-O(15)   | 160.4(2)   |
| N(6)-Zn(1)-Zn(1)#1    | 102.5(2)   | O(6)-Mo(4)-O(15)    | 92.4(2)    |
| O(2W)-Zn(2)-O(2W)#2   | 180.000(1) | O(7)-Mo(4)-O(15)    | 77.10(19)  |
| O(2W)-Zn(2)-O(1W)     | 89.5(2)    | O(19)#3-Mo(4)-O(15) | 69.63(18)  |
| O(2W)#2-Zn(2)-O(1W)   | 90.5(2)    | O(10)-Mo(4)-N(5)    | 93.4(3)    |
| O(2W)-Zn(2)-O(1W)#2   | 90.5(2)    | O(6)-Mo(4)-N(5)     | 84.4(2)    |
| O(2W)#2-Zn(2)-O(1W)#2 | 89.5(2)    | O(7)-Mo(4)-N(5)     | 159.4(2)   |
| O(1W)-Zn(2)-O(1W)#2   | 180.0(3)   | O(19)#3-Mo(4)-N(5)  | 77.2(2)    |
| O(2W)-Zn(2)-N(2)#2    | 89.7(2)    | O(15)-Mo(4)-N(5)    | 83.1(2)    |
| O(2W)#2-Zn(2)-N(2)#2  | 90.3(2)    | C(16)-N(2)-Zn(2)    | 125.1(6)   |
| O(1W)-Zn(2)-N(2)#2    | 87.8(3)    | C(10)-N(2)-Zn(2)    | 116.9(6)   |
| O(1W)#2-Zn(2)-N(2)#2  | 92.2(3)    | C(4)-N(6)-Zn(1)     | 112.7(7)   |
| O(2W)-Zn(2)-N(2)      | 90.3(2)    | C(17)-N(6)-Zn(1)    | 129.1(7)   |
| O(2W)#2-Zn(2)-N(2)    | 89.7(2)    | Mo(4)-O(7)-Mo(3)    | 114.5(2)   |
| O(1W)-Zn(2)-N(2)      | 92.2(3)    | Mo(1)-O(9)-Zn(1)    | 141.5(3)   |
| O(1W)#2-Zn(2)-N(2)    | 87.8(3)    | N(2)#2-Zn(2)-N(2)   | 180.000(1) |

**Supplementary Material (ESI) for Dalton Transactions**  
**This journal is © The Royal Society of Chemistry**

|                       |           |                      |           |
|-----------------------|-----------|----------------------|-----------|
| Mo(4)-O(15)-Mo(3)     | 90.72(17) | C(30)-O(11)-Zn(1)    | 141.3(10) |
| Mo(1)-O(19)-Mo(4)#3   | 147.0(3)  | Mo(2)#3-O(15)-Mo(4)  | 108.3(2)  |
| Mo(4)#3-O(19)-Mo(2)   | 106.4(2)  | Zn(1)#1-O(3W)-Zn(1)  | 157.5(12) |
| Zn(2)-O(1W)-H(1WA)    | 109.3     | Zn(1)#1-O(3W)-H(3WA) | 75.1      |
| Zn(2)-O(1W)-H(1WB)    | 109.2     | Zn(1)-O(3W)-H(3WA)   | 109.3     |
| Zn(2)-O(2W)-H(2WA)    | 109.3     | Zn(1)#1-O(3W)-H(3WB) | 50.2      |
| Zn(2)-O(2W)-H(2WB)    | 109.2     | Zn(1)-O(3W)-H(3WB)   | 109.3     |
| O(3W)#1-O(3W)-Zn(1)#1 | 135(2)    | Zn(1)-O(4W)-H(4WA)   | 109.2     |
| O(3W)#1-O(3W)-Zn(1)   | 22.8(11)  | Zn(1)-O(4W)-H(4WB)   | 109.1     |

Symmetry codes for **2**: #1 - x + 1, - y + 1, - z; #2 - x - 1, - y, - z + 1; #3 - x + 1, - y + 2, - z.

**C<sub>56</sub>H<sub>57</sub>Mo<sub>8</sub>N<sub>12</sub>O<sub>39</sub>Co<sub>2</sub>**

|                     |           |                    |           |
|---------------------|-----------|--------------------|-----------|
| Co(1)-O(2W)#1       | 1.237(12) | Mo(2)-O(14)        | 1.922(4)  |
| Co(1)-O(2W)         | 2.010(10) | Mo(2)-O(8)         | 1.943(4)  |
| Co(1)-O(17)         | 2.122(12) | Mo(2)-O(12)        | 2.129(4)  |
| Co(1)-O(1W)         | 2.126(12) | Mo(2)-O(8)#3       | 2.430(4)  |
| Co(1)-O(11)         | 2.132(6)  | Mo(3)-O(5)         | 1.704(5)  |
| Co(1)-N(6)          | 2.291(8)  | Mo(3)-O(4)         | 1.712(5)  |
| Co(1)-O(16)         | 2.380(6)  | Mo(3)-O(7)         | 1.956(5)  |
| Co(2)-O(4W)         | 2.083(5)  | Mo(3)-O(6)         | 1.972(5)  |
| Co(2)-O(4W)#2       | 2.083(5)  | Mo(3)-O(8)         | 2.214(4)  |
| Co(2)-O(3W)#2       | 2.126(5)  | Mo(3)-O(14)#3      | 2.284(4)  |
| Co(2)-O(3W)         | 2.126(5)  | Mo(4)-O(15)        | 1.707(5)  |
| Co(2)-N(5)#2        | 2.198(6)  | Mo(4)-O(16)        | 1.709(5)  |
| Co(2)-N(5)          | 2.198(6)  | Mo(4)-O(6)#3       | 1.869(4)  |
| Mo(1)-O(9)          | 1.705(5)  | Mo(4)-O(12)        | 2.093(4)  |
| Mo(1)-O(11)         | 1.706(5)  | Mo(4)-O(14)        | 2.245(5)  |
| Mo(1)-O(12)         | 1.931(4)  | Mo(4)-N(1)         | 2.263(5)  |
| Mo(1)-O(7)          | 1.937(4)  | O(6)-Mo(4)#3       | 1.869(4)  |
| Mo(1)-O(8)          | 2.225(4)  | O(8)-Mo(2)#3       | 2.430(4)  |
| Mo(1)-O(10)         | 2.314(4)  | O(10)-Mo(2)#3      | 1.740(5)  |
| Mo(2)-O(13)         | 1.683(4)  | O(14)-Mo(3)#3      | 2.284(4)  |
| Mo(2)-O(10)#3       | 1.740(5)  | O(2W)-Co(1)#1      | 1.237(12) |
| O(2W)#1-Co(1)-O(2W) | 22.5(10)  | O(15)-Mo(4)-O(16)  | 106.6(3)  |
| O(2W)#1-Co(1)-O(17) | 109.9(7)  | O(15)-Mo(4)-O(6)#3 | 101.8(2)  |
| O(2W)-Co(1)-O(17)   | 88.0(6)   | O(16)-Mo(4)-O(6)#3 | 103.0(2)  |
| O(2W)#1-Co(1)-O(1W) | 70.7(7)   | O(15)-Mo(4)-O(12)  | 155.1(2)  |
| O(2W)-Co(1)-O(1W)   | 91.4(5)   | O(16)-Mo(4)-O(12)  | 90.8(2)   |
| O(17)-Co(1)-O(1W)   | 170.8(5)  | O(6)#3-Mo(4)-O(12) | 91.07(18) |
| O(2W)#1-Co(1)-O(11) | 156.6(7)  | O(15)-Mo(4)-O(14)  | 92.3(2)   |
| O(2W)-Co(1)-O(11)   | 174.1(4)  | O(16)-Mo(4)-O(14)  | 160.4(2)  |
| O(17)-Co(1)-O(11)   | 93.5(4)   | O(6)#3-Mo(4)-O(14) | 77.35(18) |
| O(1W)-Co(1)-O(11)   | 86.1(3)   | O(12)-Mo(4)-O(14)  | 69.57(16) |
| O(2W)#1-Co(1)-N(6)  | 91.2(6)   | O(15)-Mo(4)-N(1)   | 84.2(2)   |
| O(2W)-Co(1)-N(6)    | 97.6(4)   | O(16)-Mo(4)-N(1)   | 93.6(2)   |

**Supplementary Material (ESI) for Dalton Transactions**  
**This journal is © The Royal Society of Chemistry**

|                       |            |                       |            |
|-----------------------|------------|-----------------------|------------|
| O(17)-Co(1)-N(6)      | 91.7(4)    | O(6)#3-Mo(4)-N(1)     | 159.7(2)   |
| O(1W)-Co(1)-N(6)      | 97.5(4)    | O(12)-Mo(4)-N(1)      | 76.89(18)  |
| O(11)-Co(1)-N(6)      | 88.1(3)    | O(14)-Mo(4)-N(1)      | 83.06(18)  |
| O(2W)#1-Co(1)-O(16)   | 89.8(6)    | C(25)-N(1)-Mo(4)      | 116.0(4)   |
| O(2W)-Co(1)-O(16)     | 82.2(4)    | C(12)-N(1)-Mo(4)      | 125.2(4)   |
| O(17)-Co(1)-O(16)     | 85.1(4)    | C(9)-N(5)-Co(2)       | 116.4(6)   |
| O(1W)-Co(1)-O(16)     | 85.8(4)    | C(13)-N(5)-Co(2)      | 125.6(5)   |
| O(11)-Co(1)-O(16)     | 92.2(2)    | C(19)-N(6)-C(23)      | 117.1(8)   |
| N(6)-Co(1)-O(16)      | 176.7(2)   | C(19)-N(6)-Co(1)      | 112.3(6)   |
| O(4W)-Co(2)-O(4W)#2   | 180.000(1) | C(23)-N(6)-Co(1)      | 130.0(6)   |
| O(4W)-Co(2)-O(3W)#2   | 89.6(2)    | Mo(4)#3-O(6)-Mo(3)    | 114.2(2)   |
| O(4W)#2-Co(2)-O(3W)#2 | 90.4(2)    | Mo(1)-O(11)-Co(1)     | 138.6(3)   |
| O(4W)-Co(2)-O(3W)     | 90.4(2)    | Mo(1)-O(12)-Mo(4)     | 146.9(2)   |
| O(4W)#2-Co(2)-O(3W)   | 89.6(2)    | Mo(4)-O(12)-Mo(2)     | 106.43(18) |
| O(3W)#2-Co(2)-O(3W)   | 180.0(3)   | Mo(2)-O(14)-Mo(4)     | 108.29(19) |
| O(4W)-Co(2)-N(5)#2    | 89.4(2)    | Mo(4)-O(14)-Mo(3)#3   | 90.87(16)  |
| O(4W)#2-Co(2)-N(5)#2  | 90.6(2)    | Mo(4)-O(16)-Co(1)     | 137.1(3)   |
| O(3W)#2-Co(2)-N(5)#2  | 87.2(2)    | C(1)-O(17)-Co(1)      | 138.6(11)  |
| O(3W)-Co(2)-N(5)#2    | 92.8(2)    | Co(1)-O(1W)-H(1WA)    | 109.1      |
| O(4W)-Co(2)-N(5)      | 90.6(2)    | Co(1)-O(1W)-H(1WB)    | 109.1      |
| O(4W)#2-Co(2)-N(5)    | 89.4(2)    | O(2W)#1-O(2W)-Co(1)#1 | 129(2)     |
| O(3W)#2-Co(2)-N(5)    | 92.8(2)    | O(2W)#1-O(2W)-Co(1)   | 28.7(13)   |
| O(3W)-Co(2)-N(5)      | 87.2(2)    | Co(1)#1-O(2W)-Co(1)   | 157.5(10)  |
| N(5)#2-Co(2)-N(5)     | 180        | Co(1)#1-O(2W)-H(2WA)  | 65.2       |
| Co(1)-O(2W)-H(2WB)    | 109.3      | Co(1)-O(2W)-H(2WA)    | 109.1      |
| Co(2)-O(3W)-H(3WA)    | 109.3      | O(2W)#1-O(2W)-H(2WB)  | 89.4       |
| Co(2)-O(3W)-H(3WB)    | 109.4      | Co(1)#1-O(2W)-H(2WB)  | 57         |
| Co(2)-O(4W)-H(4WA)    | 109.2      | Co(2)-O(4W)-H(4WB)    | 109.4      |

Symmetry codes for **3**: #1 - x + 1, - y + 1, - z; #2 - x - 1, - y, - z + 1; #3 - x + 1, - y + 2, - z.

**Table S2** Selected hydrogen bonding geometry (Å, °) for compound **1**.

| D-H...A              | D-H / Å | H...A / Å | D...A / Å | D-H...A / ° |
|----------------------|---------|-----------|-----------|-------------|
| O(11)-H(2WA)···O(2W) | 0.85    | 1.97      | 2.671     | 154         |

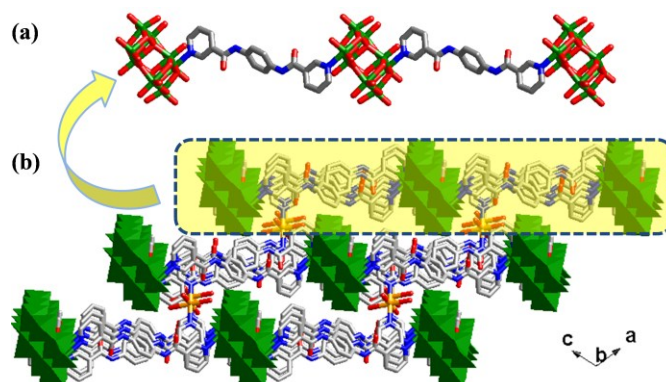

Figure S1 The 3D framework of compound 2.

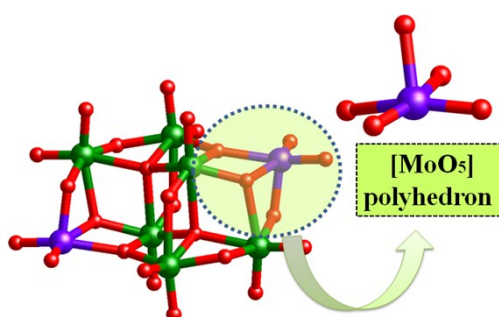

Figure S2 The  $\gamma$ -Mo<sub>8</sub> anion in compounds 1-3 including six [MoO<sub>6</sub>] and two [MoO<sub>5</sub>] polyhedra.

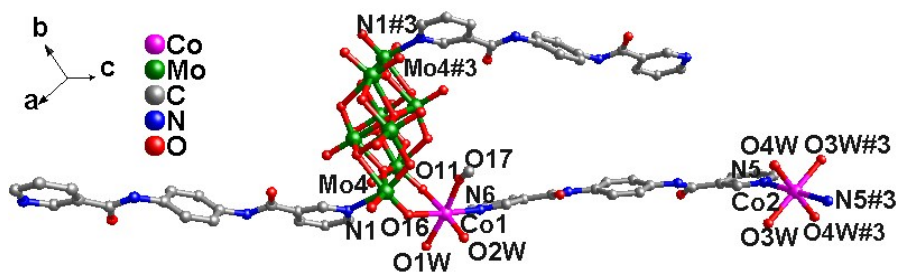

Figure S3 Stick/ball view of the asymmetric unit of 3. The hydrogen atoms are omitted for clarity.  
 Symmetry code: #1 - x + 1, - y + 1, - z, #3 - x - 1, - y, - z + 1.

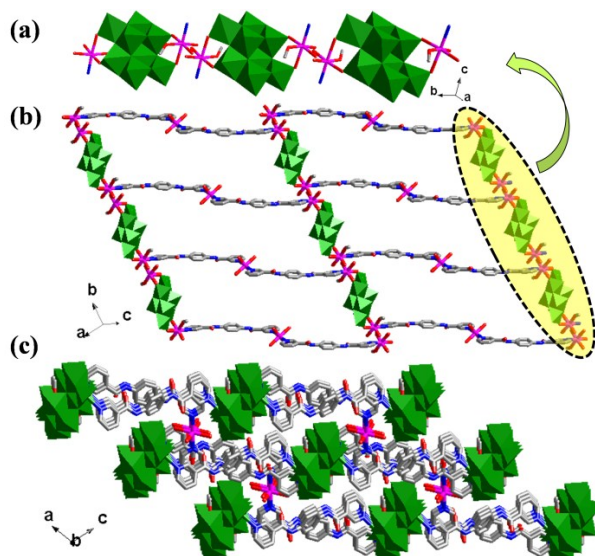

**Figure S4** (a) View of the 1D  $Zn_2-Mo_8$  chain in compound 3. (b) The 2D layer of compound 3. (c) The 3D framework of compound 3.

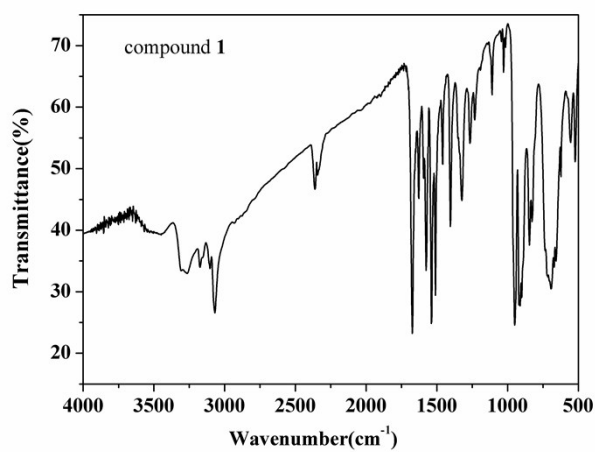

(a)

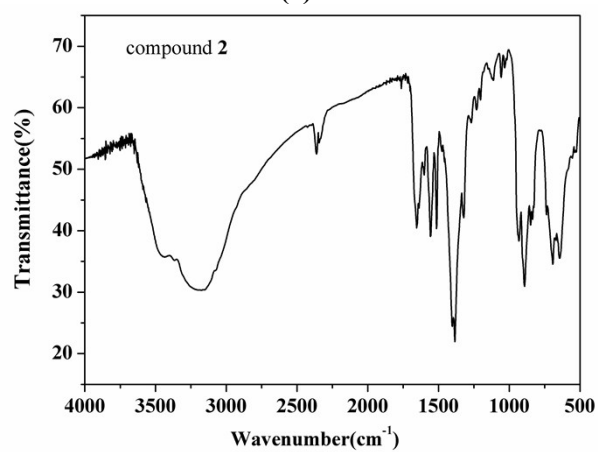

(b)

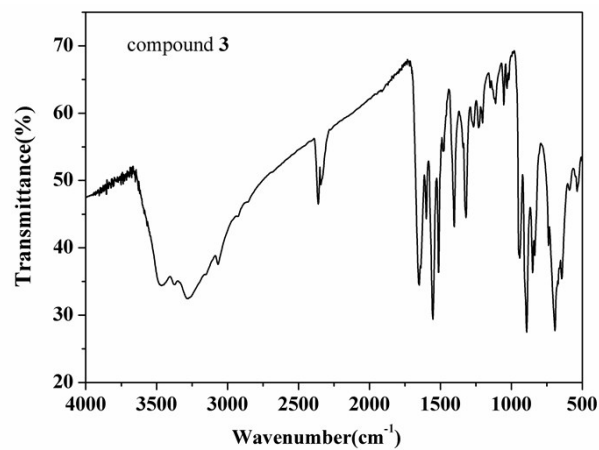

(c)

Figure S5 The IR spectra of compounds 1–3.

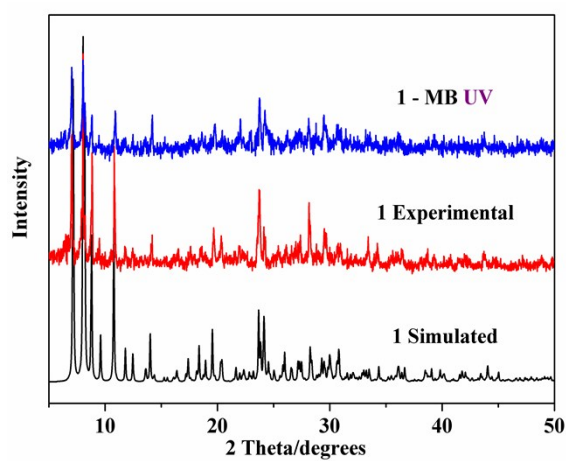

(a)

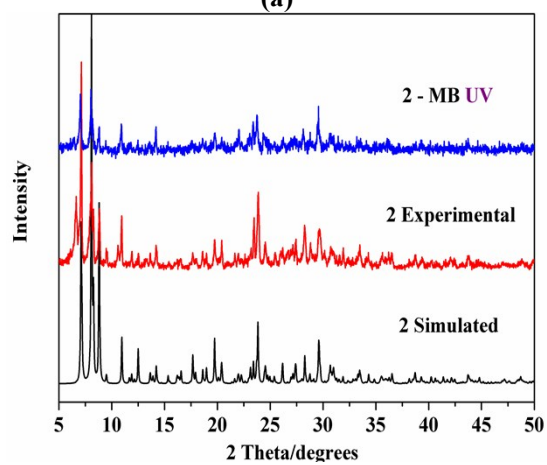

(b)



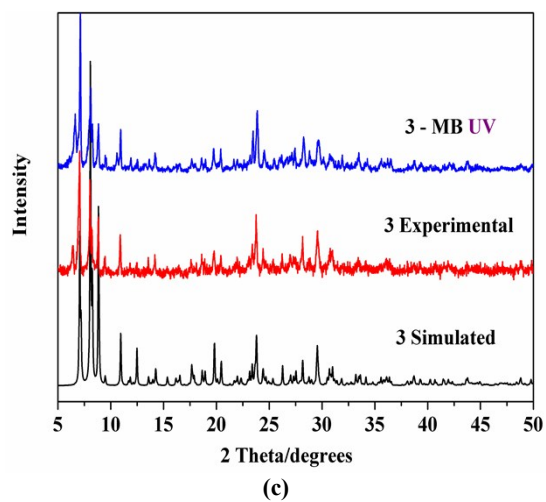

Figure S6 The PXR D patterns of compounds 1 – 3

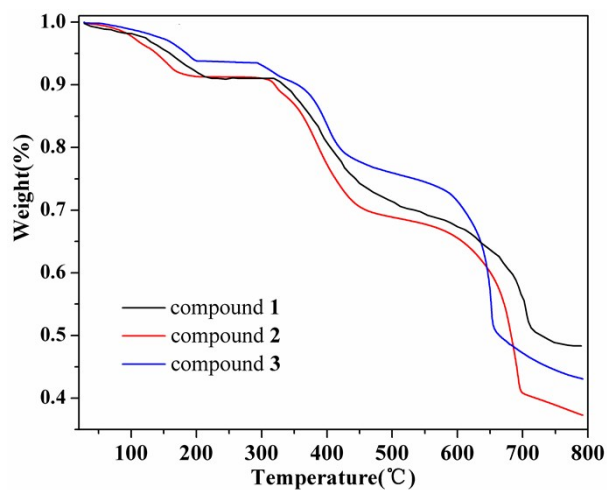

Figure S7 The TG curves of compounds 1–3.

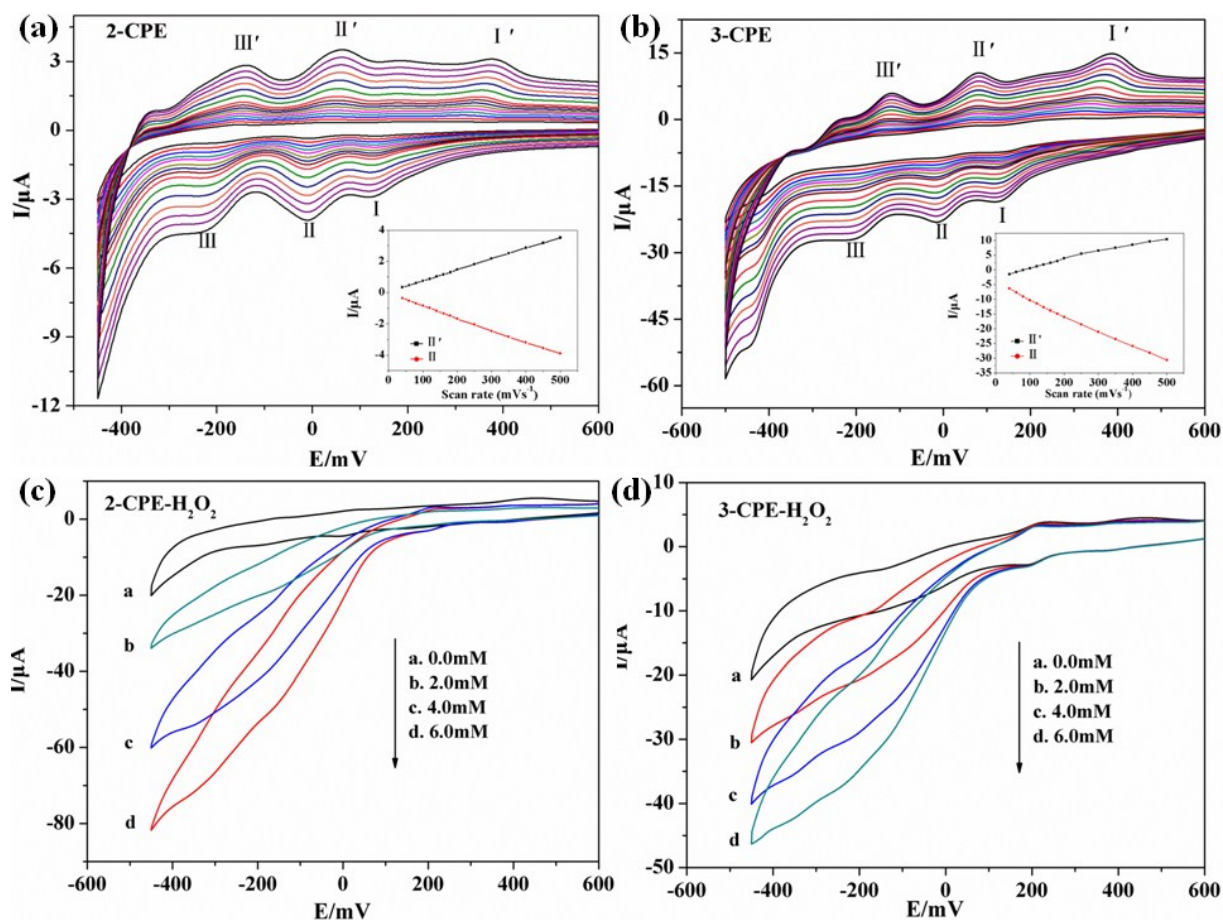

**Figure S8** Cyclic voltammograms of 2-CPE (a) and 3-CPE (b) in a 0.1 M  $\text{H}_2\text{SO}_4$  + 0.5 M  $\text{Na}_2\text{SO}_4$  solution at different scan rates (from inner to outer: 40, 80, 120, 140, 160, 180, 200, 250, 300, 350, 400, 450 and 500  $\text{mV}\cdot\text{s}^{-1}$ ). The insets show the relationship of the redox peak currents (II- II') versus scan rates. Cyclic voltammograms of 2-CPE (c) and 3-CPE (d) in a 0.1M  $\text{H}_2\text{SO}_4$  + 0.5 M  $\text{Na}_2\text{SO}_4$  solution containing 0.0–6.0 mM  $\text{H}_2\text{O}_2$ . Scan rate: 400  $\text{mV}\cdot\text{s}^{-1}$

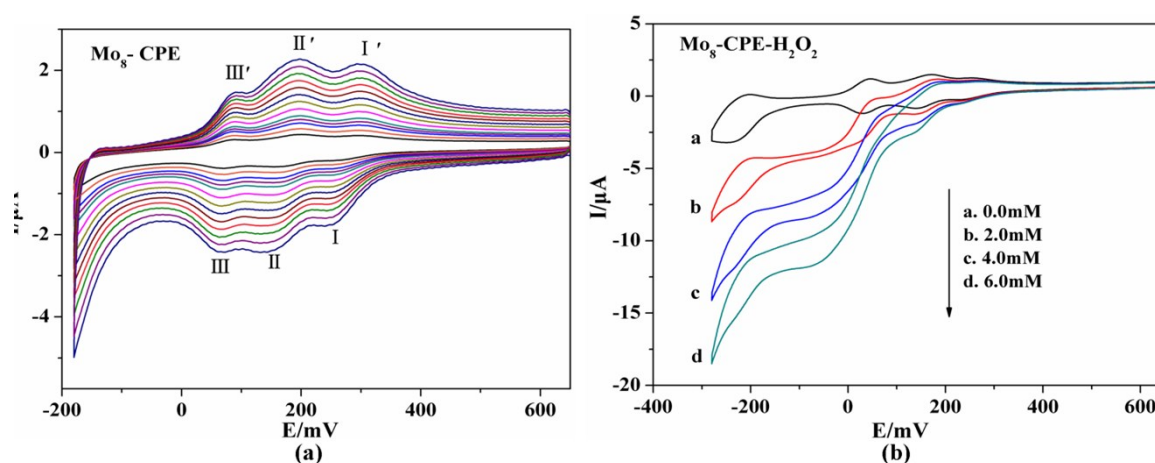

**Figure S9** (a) Cyclic voltammograms of  $\text{Mo}_8\text{-CPE}$  in a 0.1 M  $\text{H}_2\text{SO}_4$  + 0.5 M  $\text{Na}_2\text{SO}_4$  solution at different scan rates (from inner to outer: 40, 80, 120, 140, 160, 180, 200, 250, 300, 350, 400, 450 and 500  $\text{mV}\cdot\text{s}^{-1}$ ). (b) Cyclic voltammograms of  $\text{Mo}_8\text{-CPE}$  in a 0.1M  $\text{H}_2\text{SO}_4$  + 0.5 M  $\text{Na}_2\text{SO}_4$  solution containing 0.0–6.0 mM  $\text{H}_2\text{O}_2$ . Scan rate: 400  $\text{mV}\cdot\text{s}^{-1}$

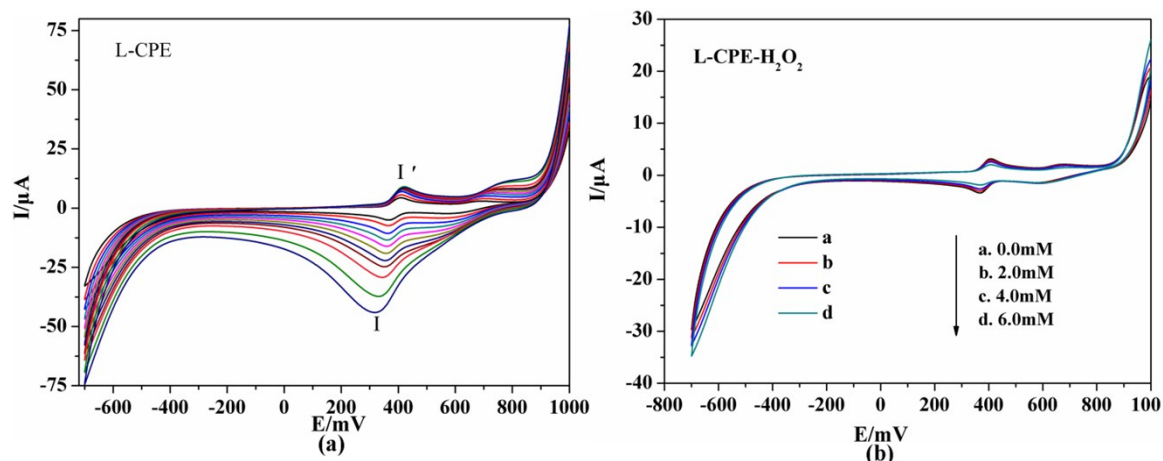

**Figure S10** (a) Cyclic voltammograms of L-CPE in a 0.1 M  $\text{H}_2\text{SO}_4$  + 0.5 M  $\text{Na}_2\text{SO}_4$  solution at different scan rates (from inner to outer: 40, 100, 160, 180, 200, 250, 300, 350, 400, 450 and  $500 \text{ mV}\cdot\text{s}^{-1}$ ). (b) Cyclic voltammograms of L-CPE in a 0.1M  $\text{H}_2\text{SO}_4$  + 0.5 M  $\text{Na}_2\text{SO}_4$  solution containing 0.0–6.0 mM  $\text{H}_2\text{O}_2$  in a 0.1M  $\text{H}_2\text{SO}_4$  + 0.5 M  $\text{Na}_2\text{SO}_4$  solution. Scan rate:  $400 \text{ mV}\cdot\text{s}^{-1}$ .

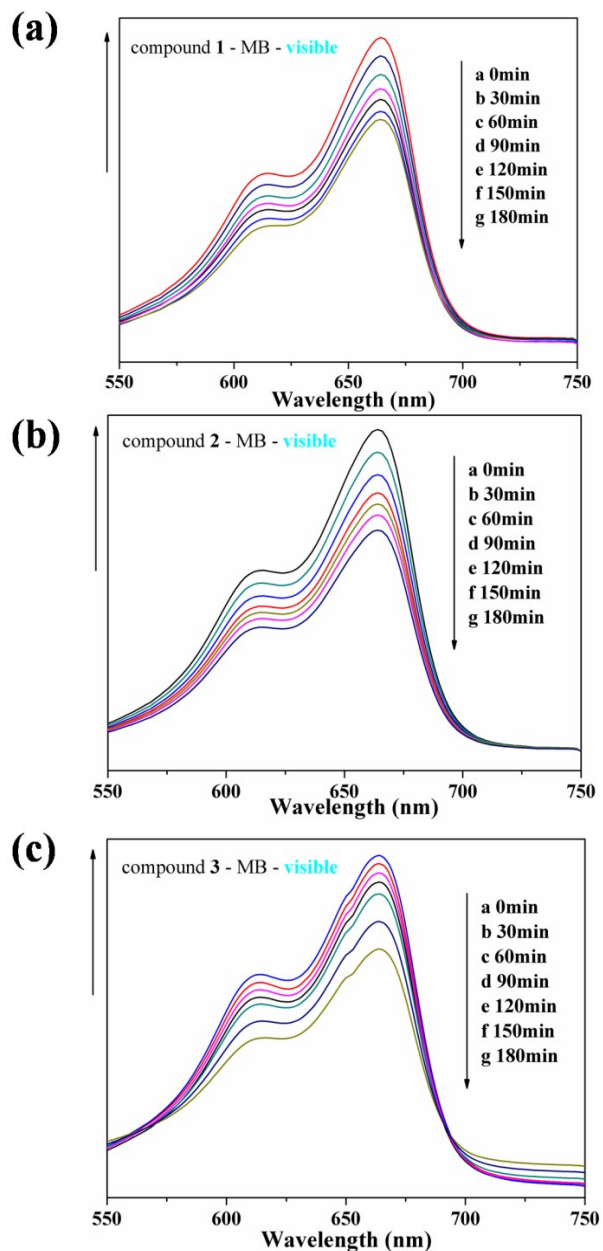

**Figure S11** Absorption spectra of the MB solution during the decomposition reaction under visible light irradiation in the presence of compound 1 (a); 2 (b) and 3 (c).

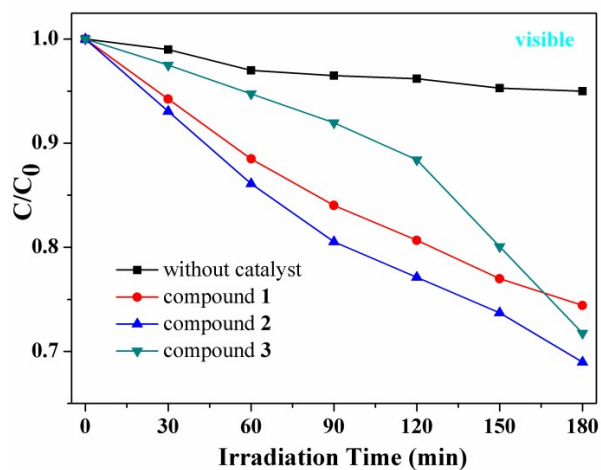

Figure S12 Photocatalytic decomposition rate of MB solution under visible light irradiation with the use of compounds 1-3.

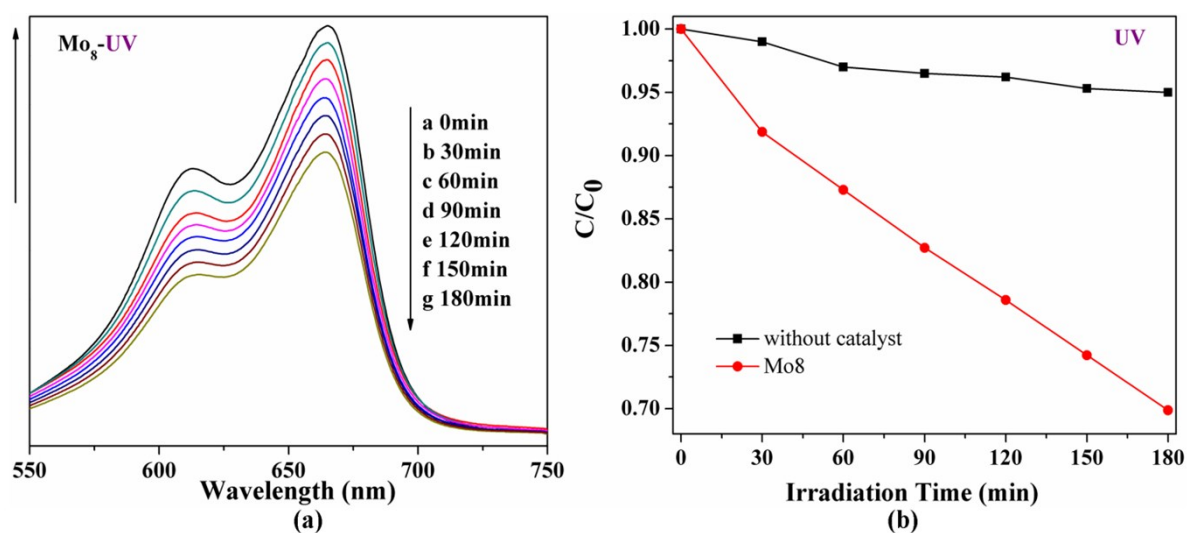

Figure S13 (a) Absorption spectra of the MB solution during the decomposition reaction under UV irradiation in the presence of Mo<sub>8</sub>; (b) Photocatalytic decomposition rate of MB solution under UV irradiation with the use of Mo<sub>8</sub>.
